# Supplementary material
Source: PubMed Central journal article supplement (PMC10575688)
Supplement: NIHMS1934133-supplement-Supplemental_Material.pdf [file NIHMS1934133-supplement-Supplemental_Material.pdf]

**Disentangling the Relationship Between Posttraumatic Stress Disorder, Criminogenic Risk, and Criminal  
History Among Veterans**

Online Supplemental Materials

Table of Contents

Table S1: Correlation Matrix .....3

Table S2: Sensitivity Analysis (PTSD *lower* threshold): Bivariate analysis of criminal history and criminogenic needs by PTSD diagnostic status .....4

Table S3: Sensitivity Analysis (PTSD *higher* threshold): Bivariate analysis of criminal history and criminogenic needs by PTSD diagnostic status .....6

**Table S1:** Correlation Matrix

| Variable                                | 1     | 2     | 3     | 4     | 5     | 6     | 7     | 8     | 9     | 10    | 11    | 12   |
|-----------------------------------------|-------|-------|-------|-------|-------|-------|-------|-------|-------|-------|-------|------|
| 1. Criminal History Index               | —     |       |       |       |       |       |       |       |       |       |       |      |
| 2. TriPM total                          | .139  | —     |       |       |       |       |       |       |       |       |       |      |
| 3. General Criminal Thinking<br>(PICTS) | .207  | .634  | —     |       |       |       |       |       |       |       |       |      |
| 4. Antisocial Associates<br>(MCAA)      | .153  | .315  | .276  | —     |       |       |       |       |       |       |       |      |
| 5. Alcohol use (TLFB)                   | -.084 | -.014 | .029  | -.061 | —     |       |       |       |       |       |       |      |
| 6. Drug use (TLFB)                      | .017  | .116  | .257  | .233  | .160  | —     |       |       |       |       |       |      |
| 7. Family/marital (ASI)                 | -.093 | .208  | .230  | -.045 | .065  | .077  | —     |       |       |       |       |      |
| 8. Employment (ASI)                     | .079  | .006  | .058  | -.027 | .009  | -.033 | .127  | —     |       |       |       |      |
| 9. Leisure/recreation                   | .048  | .018  | .038  | .027  | -.020 | -.005 | .082  | -.116 | —     |       |       |      |
| 10. Age                                 | .331  | -.363 | -.179 | -.081 | .104  | -.075 | -.184 | .047  | .206  | —     |       |      |
| 11. Education                           | -.103 | .035  | -.028 | .067  | -.05  | -.066 | .088  | -.075 | .104  | -.004 | —     |      |
| 12. Race/ethnicity                      | -.05  | -.056 | -.044 | .101  | .001  | -.008 | .071  | -.022 | -.011 | -.036 | -.074 | —    |
| 13. PTSD diagnosis                      | -.022 | .351  | .335  | .161  | -.161 | -.016 | .118  | .206  | .038  | -.213 | .132  | .026 |

*Note.* TriPM = Triarchic Psychopathy Measure; PICTS = Psychological Inventory of Criminal Thinking Styles; MCAA = Measures of Criminal Attitudes and Associates; TLFB = Timeline Follow-Back; ASI = Addiction Severity Index; PTSD = posttraumatic stress disorder.

Table S2: Sensitivity Analysis (PTSD lower threshold): Bivariate analysis of criminal history and criminogenic needs by PTSD diagnostic status

|                                                | Full Sample <sup>a</sup> | PTSD <sup>b</sup> | No PTSD <sup>c</sup> | t-test (df) | <i>p</i> | 95% <i>CI</i>   |
|------------------------------------------------|--------------------------|-------------------|----------------------|-------------|----------|-----------------|
|                                                | M ( <i>SD</i> )          | M ( <i>SD</i> )   | M ( <i>SD</i> )      |             |          |                 |
| <b>Criminal history (ASI, Lifetime)</b>        |                          |                   |                      |             |          |                 |
| Number of criminal charges                     | 14.26 (19.21)            | 14.77 (20.99)     | 12.66 (11.93)        | .87 (339)   | .386     | [-6.90, 2.68]   |
| Number of convictions                          | 6.35 (9.63)              | 6.13 (9.27)       | 7.02 (10.69)         | .729 (335)  | .467     | [-1.515, 3.30]  |
| Number of months incarcerated                  | 37.96 (65.07)            | 35.6 (62.7)       | 45.58 (72.08)        | 1.2 (334)   | .231     | [-6.38, 26.39]  |
| Criminal History Index <sup>d</sup>            | -.08 (2.13)              | -.12 (2.12)       | .04 (2.17)           | .60 (330)   | .552     | [-.38, .70]     |
| <b>Antisocial personality pattern (TriPM)</b>  |                          |                   |                      |             |          |                 |
| Total scores                                   | 82.96 (20.07)            | 86.76 (19.33)     | 70.95 (17.55)        | -6.59 (339) | <.001    | [-20.52,11.09]  |
| Boldness                                       | 31.96 (8.19)             | 32.07 (8.14)      | 31.60 (8.38)         | -.46 (339)  | .651     | [-2.51, 1.57]   |
| Meanness                                       | 16.99 (10.46)            | 18.58 (10.41)     | 11.97 (9.01)         | -5.17 (339) | <.001    | [-9.12, -4.09]  |
| Disinhibition                                  | 34.01 (11.45)            | 36.11 (10.79)     | 27.37 (10.96)        | -6.36 (339) | <.001    | [-11.44, -6.04] |
| <b>Antisocial cognitions (PICTS; T-scores)</b> |                          |                   |                      |             |          |                 |
| Mollification                                  | 52.41 (11.78)            | 53.88 (12.22)     | 47.77 (8.84)         | -4.20 (339) | <.001    | [-8.98, -3.25]  |
| Cutoff                                         | 61.60 (10.99)            | 63.32 (10.99)     | 56.21 (9.12)         | -5.30 (339) | <.001    | [-9.74, -4.47]  |
| Entitlement                                    | 55.99 (11.50)            | 57.65 (11.83)     | 50.79 (8.59)         | -4.85 (339) | <.001    | [-9.63, -4.08]  |
| Power Orientation                              | 57.46 (12.23)            | 59.13 (12.32)     | 52.18 (10.39)        | -4.61 (339) | <.001    | [-9.91, -3.99]  |
| Super-optimism                                 | 55.55 (12.18)            | 57.36 (12.17)     | 49.84 (10.34)        | -5.04 (339) | <.001    | [-10.45, -4.58] |
| Cognitive Indolence                            | 56.48 (9.95)             | 57.83 (9.99)      | 52.22 (8.52)         | -4.58 (339) | <.001    | [-8.02, -3.20]  |

|                                         |               |               |               |             |       |                 |
|-----------------------------------------|---------------|---------------|---------------|-------------|-------|-----------------|
| Discontinuity                           | 59.72 (11.36) | 61.22 (11.55) | 54.95 (9.43)  | -4.48 (339) | <.001 | [-9.03, -3.52]  |
| Problem Avoidance                       | 60.48 (10.65) | 61.84 (10.70) | 56.17 (9.31)  | -4.31 (339) | <.001 | [-8.26, -3.08]  |
| Self-Assertion/Deception                | 56.54 (11.58) | 58.31 (11.63) | 50.93 (9.48)  | -5.23 (339) | <.001 | [-10.17, -4.61] |
| Current Criminal Thinking               | 59.78 (11.02) | 61.30 (11.14) | 54.98 (9.15)  | -4.67 (339) | <.001 | [-8.99, -3.66]  |
| Proactive Criminal Thinking             | 56.49 (12.33) | 58.47 (12.55) | 50.26 (9.22)  | -5.47 (339) | <.001 | [-11.16, -5.26] |
| Reactive Criminal Thinking              | 60.14 (11.09) | 61.83 (11.20) | 54.79 (8.85)  | -5.19 (339) | <.001 | [-9.70, -4.37]  |
| General Criminal Thinking               | 59.12 (11.71) | 61.14 (11.83) | 52.80 (8.78)  | -5.89 (339) | <.001 | [-11.13, -5.56] |
| <b>Antisocial associates (MCAA)</b>     |               |               |               |             |       |                 |
| Criminal Friends Index                  | 7.84 (8.46)   | 8.49 (8.66)   | 5.62 (7.41)   | -1.83 (162) | .069  | [-5.96, .23]    |
| <b>Substance use problems (TLFB)</b>    |               |               |               |             |       |                 |
| Days in past 6 months using alcohol     | 38.39 (51.22) | 38.01 (51.37) | 39.61 (51.03) | .24 (339)   | .807  | [-11.20, 14.37] |
| Days in past 6 months using drugs       | 50.97 (58.34) | 55.65 (59.68) | 39.18 (55.68) | -2.66 (339) | .008  | [-33.88, -5.10] |
| <b>Family/marital dysfunction (ASI)</b> |               |               |               |             |       |                 |
| Family/Social composite                 | 0.21 (0.20)   | 0.23 (.20)    | 0.13 (0.15)   | -3.75 (335) | <.001 | [-.134, -.04]   |
| <b>Employment problems (ASI)</b>        |               |               |               |             |       |                 |
| Employment composite                    | 0.81(0.21)    | 0.81 (.21)    | 0.80 (.21)    | -.036 (338) | .971  | [-.05, .05]     |
| <b>Prosocial activities</b>             |               |               |               |             |       |                 |
| Self-Help Group Involvement             | 5.7 (2.37)    | 5.73 (2.35)   | 5.46 (2.44)   | -.903 (328) | .378  | [-.88, .33]     |

Notes. <sup>a</sup> N = 341, <sup>b</sup> N = 259, <sup>c</sup> N = 82. <sup>d</sup> z-scored composite based on the average lifetime charges, convictions, and months incarcerated. ASI = Addiction Severity Index. TriPM = Triarchic Psychopathy Measure, PICTS = Psychological Inventory of Criminal Thinking Styles, MCAA = Measures of Criminal Attitudes and Associates. TLFB = Timeline Follow-Back interview.

Table S3: Sensitivity Analysis (PTSD higher threshold): Bivariate analysis of criminal history and criminogenic needs by PTSD diagnostic status.

|                                                | Full Sample <sup>a</sup> | PTSD <sup>b</sup> | No PTSD <sup>c</sup> |             |          |                  |
|------------------------------------------------|--------------------------|-------------------|----------------------|-------------|----------|------------------|
|                                                | M (SD)                   | M (SD)            | M (SD)               | t-test (df) | <i>p</i> | 95% CI           |
| <b>Criminal history (ASI, Lifetime)</b>        |                          |                   |                      |             |          |                  |
| Number of criminal charges                     | 14.26 (19.21)            | 15.55 (22.94)     | 12.67 (13.08)        | -1.38 (339) | .168     | [-6.99, 1.23]    |
| Number of convictions                          | 6.35 (9.63)              | 6.05 (9.69)       | 6.72 (9.57)          | .638 (335)  | .524     | [-1.40, 2.75]    |
| Number of months incarcerated                  | 37.96 (65.07)            | 34.10 (60.14)     | 42.73 (70.63)        | 1.21 (334)  | .227     | [-5.41, 22.67]   |
| Criminal History Index <sup>d</sup>            | -.08 (2.13)              | -.11 (2.14)       | -.05 (2.11)          | .280 (330)  | .779     | [-.40, .23]      |
| <b>Antisocial personality pattern (TriPM)</b>  |                          |                   |                      |             |          |                  |
| Total scores                                   | 82.96 (20.07)            | 89.48 (19.50)     | 74.84 (17.71)        | -7.18 (339) | <.001    | [-18.66, -10.64] |
| Boldness                                       | 31.96 (8.19)             | 32.04 (8.32)      | 31.86 (8.05)         | -.208 (339) | .835     | [-1.94, 1.57]    |
| Meanness                                       | 16.99 (10.46)            | 19.86 (10.98)     | 13.42 (8.56)         | -5.93 (339) | <.001    | [-8.52, -4.36]   |
| Disinhibition                                  | 34.01 (11.45)            | 37.58 (10.59)     | 29.56 (10.93)        | -6.86 (339) | <.001    | [-10.33, -5.71]  |
| <b>Antisocial cognitions (PICTS; T-scores)</b> |                          |                   |                      |             |          |                  |
| Mollification                                  | 52.41 (11.78)            | 55.71 (12.55)     | 48.32 (9.27)         | -6.05 (339) | <.001    | [-9.79, -4.99]   |
| Cutoff                                         | 61.60 (10.99)            | 63.31 (10.99)     | 56.21 (9.12)         | -5.30 (339) | <.001    | [-9.74, -4.47]   |
| Entitlement                                    | 55.99 (11.50)            | 58.65 (12.17)     | 52.70 (9.69)         | -4.91 (339) | <.001    | [-8.34, -3.57]   |
| Power Orientation                              | 57.46 (12.23)            | 60.82 (12.4)      | 52.29 (10.67)        | -5.92 (339) | <.001    | [-10.03, -5.03]  |
| Super-optimism                                 | 55.55 (12.18)            | 58.69 (10.23)     | 51.65 (10.23)        | -5.54 (339) | <.001    | [-9.55, -4.54]   |

|                                         |               |               |               |              |       |                 |
|-----------------------------------------|---------------|---------------|---------------|--------------|-------|-----------------|
| Cognitive Indolence                     | 56.48 (9.95)  | 59.67 (9.95)  | 52.51 (8.42)  | -7.07 (339)  | <.001 | [-9.15, -5.17]  |
| Discontinuity                           | 59.72 (11.36) | 63.32 (11.31) | 55.24 (9.74)  | -6.97 (339)  | <.001 | [-10.36, -5.80] |
| Problem Avoidance                       | 60.48 (10.65) | 63.82 (10.60) | 56.32 (9.19)  | -6.89 (339)  | <.001 | [-9.64, -5.36]  |
| Self-Assertion/Deception                | 56.54 (11.58) | 59.49 (11.80) | 52.86 (10.20) | -5.478 (339) | <.001 | [-9.01, -4.25]  |
| Current Criminal Thinking               | 59.78 (11.02) | 63.53 (10.80) | 55.12 (9.43)  | -7.56 (339)  | <.001 | [-10.60, -6.22] |
| Proactive Criminal Thinking             | 56.49 (12.33) | 60.26 (12.75) | 51.82 (10.01) | -6.67 (339)  | <.001 | [-10.94, -5.96] |
| Reactive Criminal Thinking              | 60.14 (11.09) | 64.04 (10.95) | 55.28 (9.20)  | -7.88 (339)  | <.001 | [-10.95, -6.58] |
| General Criminal Thinking               | 59.12 (11.71) | 63.34 (11.63) | 53.92 (9.55)  | -8.20 (339)  | <.001 | [-11.73, -7.11] |
| <b>Antisocial associates (MCAA)</b>     |               |               |               |              |       |                 |
| Criminal Friends Index                  | 7.84 (8.46)   | 8.73 (8.38)   | 6.74 (8.48)   | -1.50 (162)  | .039  | [-4.60, .63]    |
| <b>Substance use problems (TLFB)</b>    |               |               |               |              |       |                 |
| Days in past 6 months using alcohol     | 38.39 (51.22) | 39.83 (52.15) | 36.61 (50.15) | -.578 (339)  | .565  | [-14.20, 7.78]  |
| Days in past 6 months using drugs       | 50.97 (58.34) | 58.92 (60.50) | 41.08 (54.12) | -2.84 (339)  | .005  | [-30.22, -5.47] |
| <b>Family/marital dysfunction (ASI)</b> |               |               |               |              |       |                 |
| Family/Social composite                 | 0.21 (0.20)   | 0.25 (.22)    | 0.15 (0.15)   | -4.67 (335)  | <.001 | [-.14, -.06]    |
| <b>Employment problems (ASI)</b>        |               |               |               |              |       |                 |
| Employment composite                    | 0.81 (0.21)   | 0.82 (.20)    | 0.80 (.22)    | -.71 (338)   | .481  | [-.06, .03]     |
| <b>Prosocial activities</b>             |               |               |               |              |       |                 |
| Self-Help Group Involvement             | 5.7 (2.37)    | 5.71 (2.38)   | 5.62 (2.46)   | -.34 (328)   | .733  | [-.61, .43]     |

---

*Notes.* <sup>a</sup>  $N = 341$ , <sup>b</sup>  $N = 189$ , <sup>c</sup>  $N = 152$ .<sup>d</sup>  $z$ -scored composite based on the average lifetime charges, convictions, and months incarcerated. ASI = Addiction Severity Index. TriPM = Triarchic Psychopathy Measure, PICTS = Psychological Inventory of Criminal Thinking Styles, MCAA = Measures of Criminal Attitudes and Associates. TLFB = Timeline Follow-Back interview.
